# Supplementary material for: A salt-assisted acid etching strategy for hollow mesoporous silica/organosilica for pH-responsive drug and gene co-delivery
Source: Royal Society of Chemistry journal article supplement (doi:10.1039/c4tb01581a), 2014-11-05
Supplement: c4tb01581a1.pdf [file c4tb01581a1.pdf]

## Supporting Information for

### **A Salt-Assisted Acid Etching Strategy to Hollow Mesoporous Silica/Organosilica for pH-Responsive Drug and Gene Co-Delivery**

*Meiying Wu, Yu Chen, Lingxia Zhang, Xiaoyu Li, Xiaojun Cai, Yanyan Du, Linlin Zhang and Jianlin Shi\**

[\*] Prof. J. Shi. Corresponding-Author.

Dr. M. Wu, Dr. Y. Chen, Dr. L. Zhang, Dr. X. Li, Dr. X. Cai, Dr. Y. Du, Dr. L. Zhang  
State Key Laboratory of High Performance Ceramics and Superfine Microstructure,  
Shanghai Institute of Ceramics, Chinese Academy of Sciences, 1295 Ding-Xi Road,  
Shanghai 200050, PR China

E-mail: jlshi@mail.sic.ac.cn (J.Shi)

## ***A: Experimental Section***

### **1. Materials**

Tetraethyl orthosilicate (TEOS), ethanol, sodium carbonate ( $\text{Na}_2\text{CO}_3$ ), ammonia solution (25-28%), hydrochloric acid (HCl), sulfuric acid ( $\text{H}_2\text{SO}_4$ ), sodium chloride (NaCl), sodium sulfate ( $\text{Na}_2\text{SO}_4$ ) were obtained from Sinopharm Chemical Reagent Co.. Octadecyltrimethoxysilane ( $\text{C}_{18}\text{TMS}$ ) was purchased from Tokyo Chemical Industry Co. Ltd.. Cetyltrimethyl ammonium bromide ( $\text{C}_{16}\text{TAB}$ ), Rhodamine B isothiocyanate (RITC), 1,4-bis(triethoxysilyl)benzene (BTEB) with R = phenylene group were purchased from Sigma-Aldrich. Phosphate buffer solution (PBS) and cell culture medium RPMI 1640 were purchased from Shanghai Runcheng Bio-Tech Co. Ltd. Fetal bovine serum (FBS) and Trypsin-EDTA were obtained from Gibco-BRL (Burlington, Canada). Lyso Tracker Green DND-26 were purchased from Invitrogen (Oregon, USA). Deionized water was used in all experiments. All chemicals were used as received without further purification.

### **2. Characterization**

Transmission electron microscopy (TEM) images were acquired on a JEM-2100F electron microscope operated at 200 kV. Scanning electron microscopy (SEM) images/scanning transmission electron microscopy (STEM) images and corresponding element mapping / EDS spectrum were obtained on a field emission Magellan 400 microscope (FEI Company). Nitrogen adsorption-desorption isotherms and pore size distribution at 77 K were tested on a Micrometitics Tristar 3000 system. All samples were pretreated for 4 h at 423 K under nitrogen before measurements. The pore size distributions were calculated from desorption branches of isotherms by the Barrett-Joyner-Halenda (BJH) method. Specific surface areas were calculated by the Brunauer\_ Emmett\_ Teller (BET) method. Ultraviolet / Visible (UV/Vis) spectra were recorded on a UV-3101PC Shimadzu spectroscope. Dynamic light scattering (DLS) measurement was conducted on Zetasizer Nanoseries (Nano ZS90). Inductively coupled plasma atomic emission spectrometry (ICP-AES) test was conducted on VISTA (Varian company, American). The CLSM images were obtained

in FV 1000, Olympus, Japan.

## B: Supplementary figures

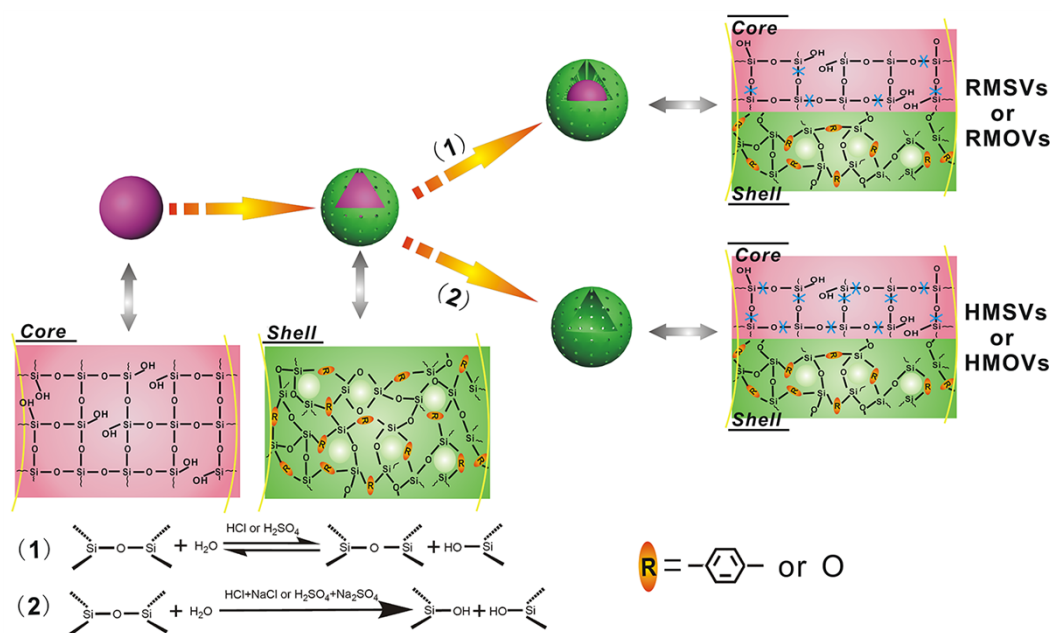

**Figure S1.** Schematic illustration of the synthetic procedure for R/HMSVs and R/HMOV employing the acid etchants such as HCl, H<sub>2</sub>SO<sub>4</sub> and NaCl, Na<sub>2</sub>SO<sub>4</sub>. The R moiety within the shell framework is phenylene (aromatic) group or oxygen.

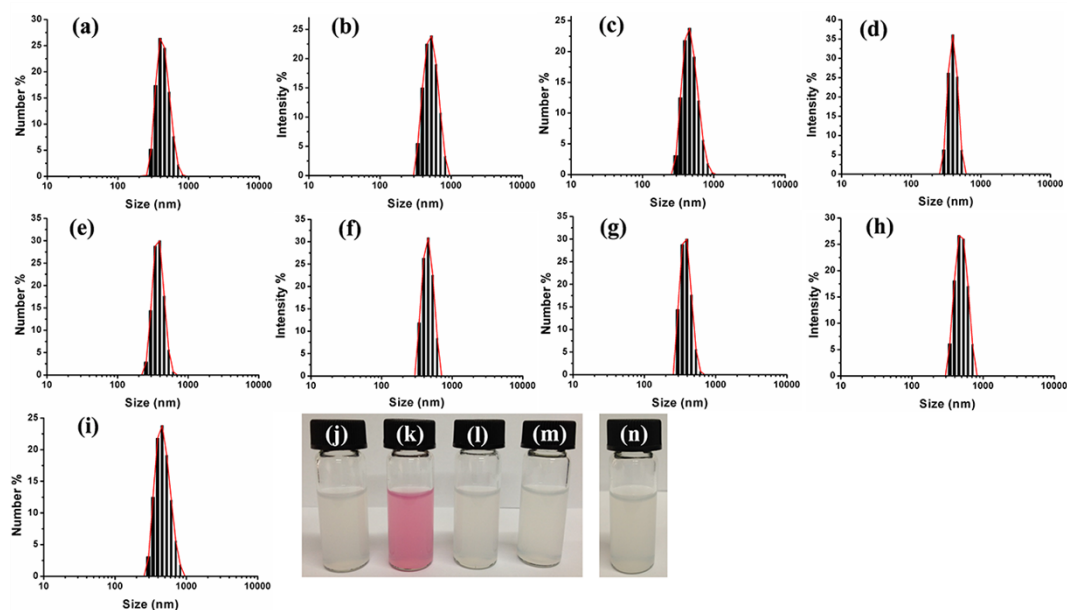

**Figure S2.** DLS particle size distribution of HMOV dispersed in water (number-based data a), cell-culture media (intensity-based data b and number-based data c), phosphate buffer solution (PBS, intensity-based data d and number-based data e) and saline solution (intensity-based data f and number-based data g). DLS particle size distribution of HMOV in water after one month storage (intensity-based data h and number-based data i). The photos j, k, l, m and n are the corresponding nanoparticles dispersions in water, cell-culture media, PBS, saline solution and water after one month storage.

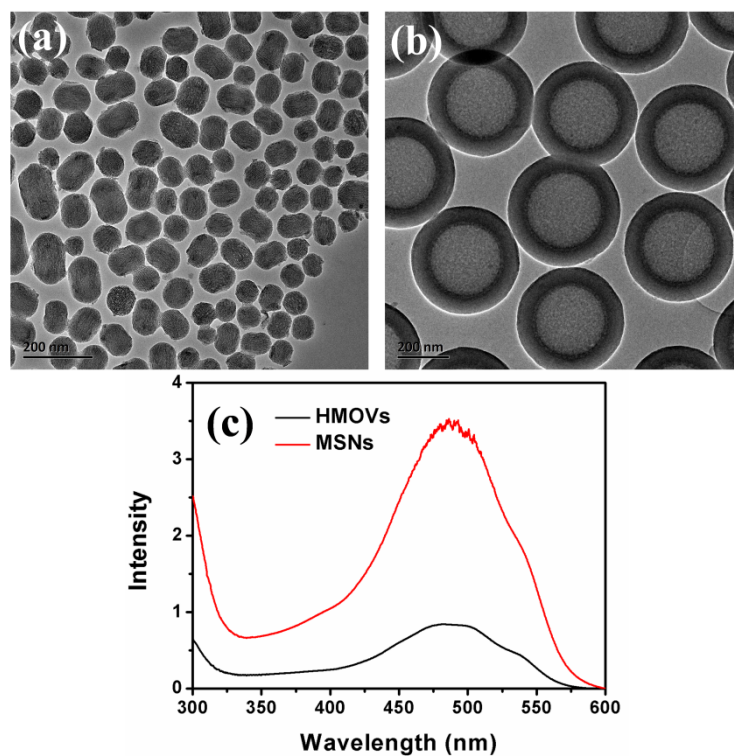

**Figure S3.** TEM images of MSNs (a) and HMOVs (b). UV-Vis spectra of DOX supernatant solution after loaded in MSNs (a) and HMOVs (b).

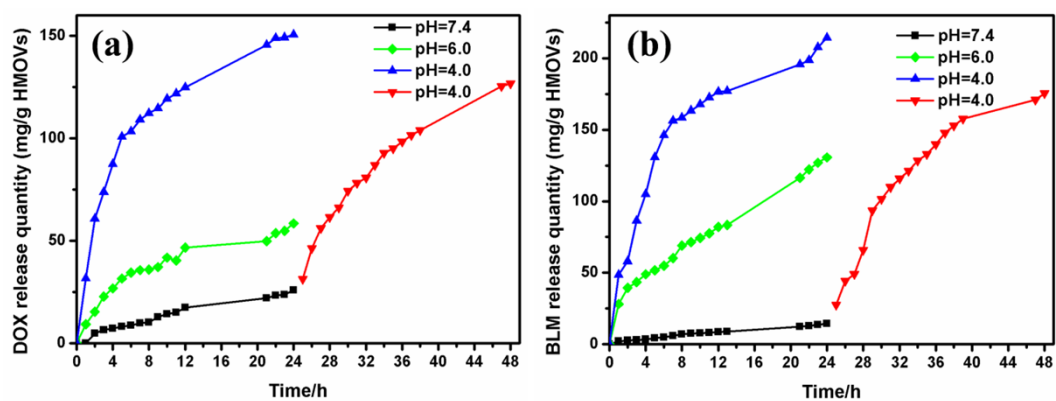

**Figure S4.** The releasing profiles of anticancer drug (a) DOX and (b) BLM from HMOVs nanosystems at different pH values (7.4, 6.0 and 4.0).

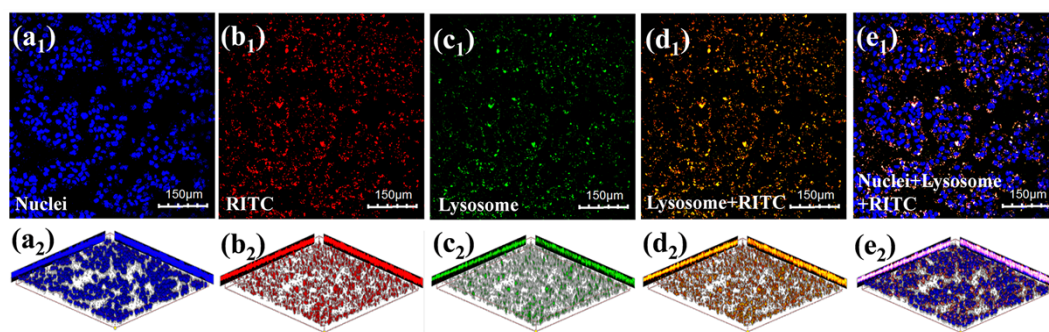

**Figure S5.** CLSM images of MCF-7/ADR cancer cells after co-incubation with RITC-HMOVs (50  $\mu\text{g/mL}$ ) for 4 h. After incubation, the cell nuclei were stained with DAPI and lysosomes were stained with Lyso Tracker Green DND-26, and three-dimensional confocal fluorescence reconstruction images of RITC-HMOVs endocytosed by MCF-7/ADR cancer cells to demonstrate the internalization and intracellular location of nanoparticles within cancer cells (nuclei (a<sub>1</sub> and a<sub>2</sub>): blue fluorescence of DAPI staining; HMOVs (b<sub>1</sub> and b<sub>2</sub>): red fluorescence of RITC grafting; Lysosomes (c<sub>1</sub> and c<sub>2</sub>): green fluorescence of Lyso Tracker Green DND-26 staining); Merged images of red and green fluorescence (d<sub>1</sub> and d<sub>2</sub>); merged images of blue, red and green fluorescence (e<sub>1</sub> and e<sub>2</sub>).

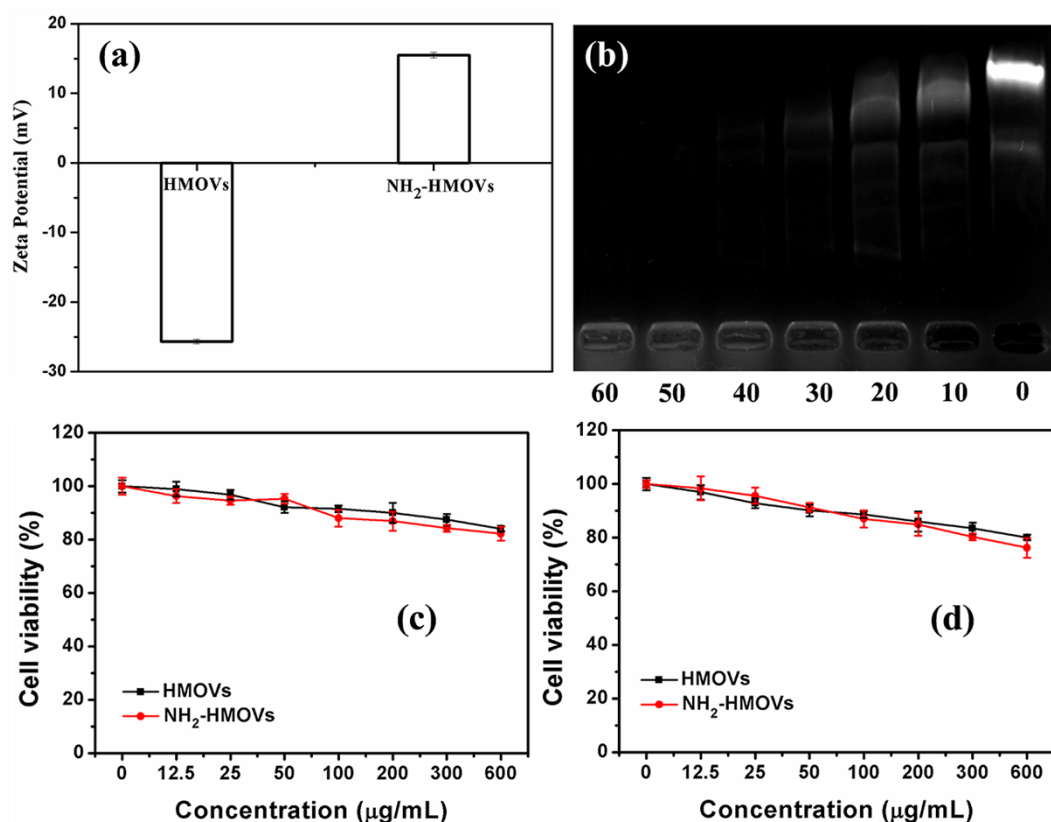

**Figure S6.** (a) Zeta potentials of HMOVs and NH<sub>2</sub>-HMOVs. (b) Gel retardation electrophoresis assay demonstrating the shRNA-nanoparticle complexation at different mass ratio (MR) of NH<sub>2</sub>-HMOVs to shRNA (MR=0, 10, 20, 30, 40, 50 and 60). Cell viabilities of HMOVs and NH<sub>2</sub>-HMOVs against MCF-7/ADR cancer cells at different concentrations in 24 h (c) and 48 h (d) of incubation.
